# Supplementary material for: Construction of three-dimensional net-like polyelectrolyte multilayered nanostructures onto titanium substrates for combined antibacterial and antioxidant applications
Source: Royal Society of Chemistry journal article supplement (doi:10.1039/c8tb00192h), 2018-01-01
Supplement: c8tb00192h1.pdf [file c8tb00192h1.pdf]

## Supporting Information

### Construction of Three-dimensional Net-like Polyelectrolyte Multilayered Nanostructure onto Titanium Substrates for Combined Antibacterial and Antioxidant Application

Linawati Sutrisno,<sup>†a</sup> Sixiang Wang,<sup>†b</sup> Yan Hu,<sup>\*a</sup> Menghuan Li,<sup>c</sup> Zhong Luo,<sup>c</sup> Chunli Wang,<sup>b</sup> Tingting Shen,<sup>a</sup> Peixing Chen,<sup>b</sup> Li Yang,<sup>b</sup> Kaiyong Cai<sup>\*a</sup>

a Key Laboratory of Biorheological Science and Technology of Ministry of Education, College of Bioengineering, Chongqing University, Chongqing 40044, PR China.

b National Innovation and Attracting Talents “111” base, Key Laboratory of Biorheological Science and Technology, Ministry of Education, College of Bioengineering, Chongqing University, Chongqing 400044, P.R. China.

CSchool of Life Science, Chongqing University, Chongqing 400044, P. R. China

<sup>†</sup> These authors contributed equally to this work

\*Corresponding author: Prof. Hu Yan and Prof. Kaiyong Cai

College of Bioengineering

Chongqing University

Chongqing 400044

P.R. China

Tel: +86-23-65102507

Fax: +86-23-65102877

E-mail: [huyan303@cqu.edu.cn](mailto:huyan303@cqu.edu.cn); [kaiyong\\_cai@cqu.edu.cn](mailto:kaiyong_cai@cqu.edu.cn)

**Table S1.** Primers used for qRT-PCR in this study

| Genes               | Accession no.  | Primers                                                     | Product size (bp) |
|---------------------|----------------|-------------------------------------------------------------|-------------------|
| Integrin $\beta$ 3  | NM_153720.1    | 5'- TGACCCGCTTCAATGACGAA-3'<br>5'- ATGGGTCTTGGCATCAGTGG-3'  | 217               |
| Integrin $\beta$ 1  | NM_017022.2    | 5'-ACAAGAGTGCCGTGACAACT-3'<br>5'-GTCTTCTGTCAAGTCCCTGGC-3'   | 242               |
| Integrin $\alpha$ 2 | XM_001075558.5 | 5'-AGGGTACCATTGCGACCAAG-3'<br>5'-AGTTGAACCACTTGCCCCAA-3'    | 163               |
| Integrin $\alpha$ v | NM_001106549.1 | 5'-TTATGCCAAAGATGACCCACT-3'<br>5'- CGGGACCTCCAAGAAGTACTC-3' | 167               |
| Col 1               | NM_053304.1    | 5'-CCTGAGCCAGCAGATTGA-3'<br>5'-TCCGCTCTTCCAGTCAG-3'         | 106               |
| ALP                 | NM_013059      | 5'-AGCGACACGGACAAGAAGC-3'<br>5'-GGCAAAGA CCGCCACATC-3'      | 183               |
| Runx2               | NM_053470.2    | 5'-GCCGTAGAGAGCAGGGAAGAC-3'<br>5'-CTGGCTTGGATTAGGGAGTCAC-3' | 318               |
| OCN                 | NM_013414.1    | 5'-GAGGGCAGTAAGGTGGTGAA-3'<br>5'-CGTCCTGGAAGCCAATG TG-3'    | 154               |
| OPG                 | NM_012870.2    | 5'-ATTGGCTGAGTGTTCTGGTGG-3'<br>5'-GACGGTTTTGGGAAAGTGGTAT-3' | 431               |
| OPN                 | NM_012881.2    | 5'-GACAGCAACGGGAAGACC-3'<br>5'-CAGGCTGGCTTTGGAAC-3'         | 216               |
| GAPDH               | NM_017008.4    | 5'-GTTCCAATATGATTCCACCC-3'<br>5'-TGAGTCCTTCCACGATACC-3'     | 400               |

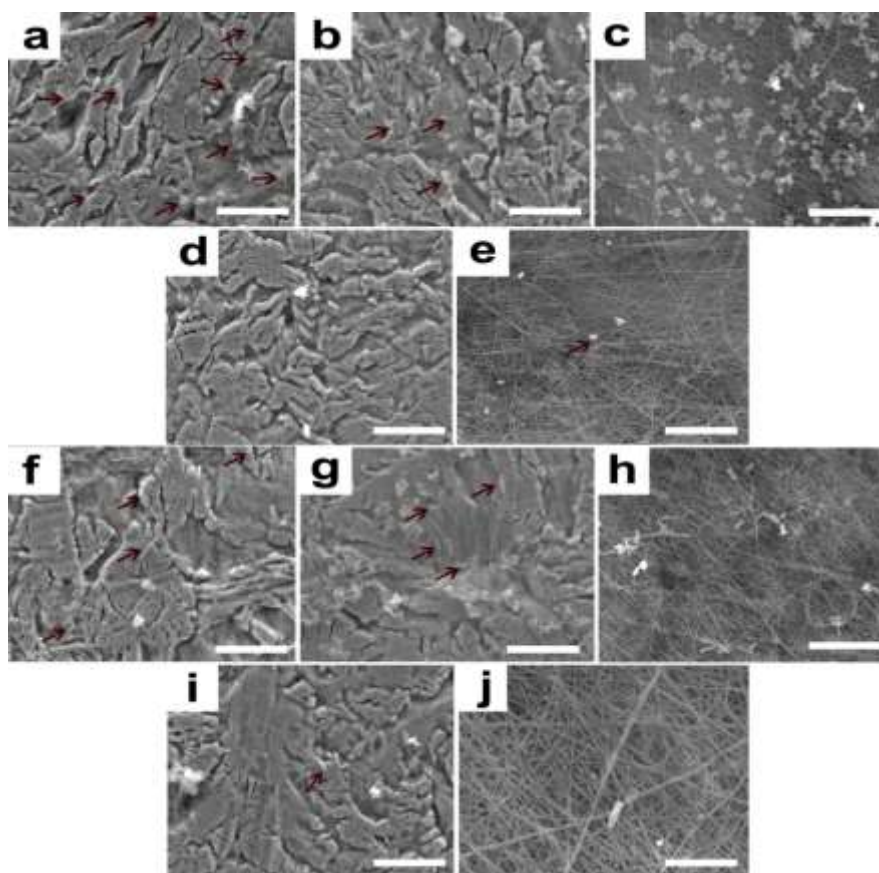

**Figure S1.** *In vitro* antibacterial treatment against *Staphylococcus aureus* on different Ti surfaces representative SEM images of *Staphylococcus aureus* adhered to: (a) Ti, (b) Ti-PDA, (c) Ti-PDA/NF, (d) Ti/LBL, (e) Ti-PDA/NF/LBL. Scale bar: 10μm; representative SEM images of *Escherichia coli* adhered to: (f) Ti, (g) Ti-PDA, (h) Ti-PDA/NF, (i) Ti/LBL, (j) Ti-PDA/NF/LBL. Scale bar: 10μm

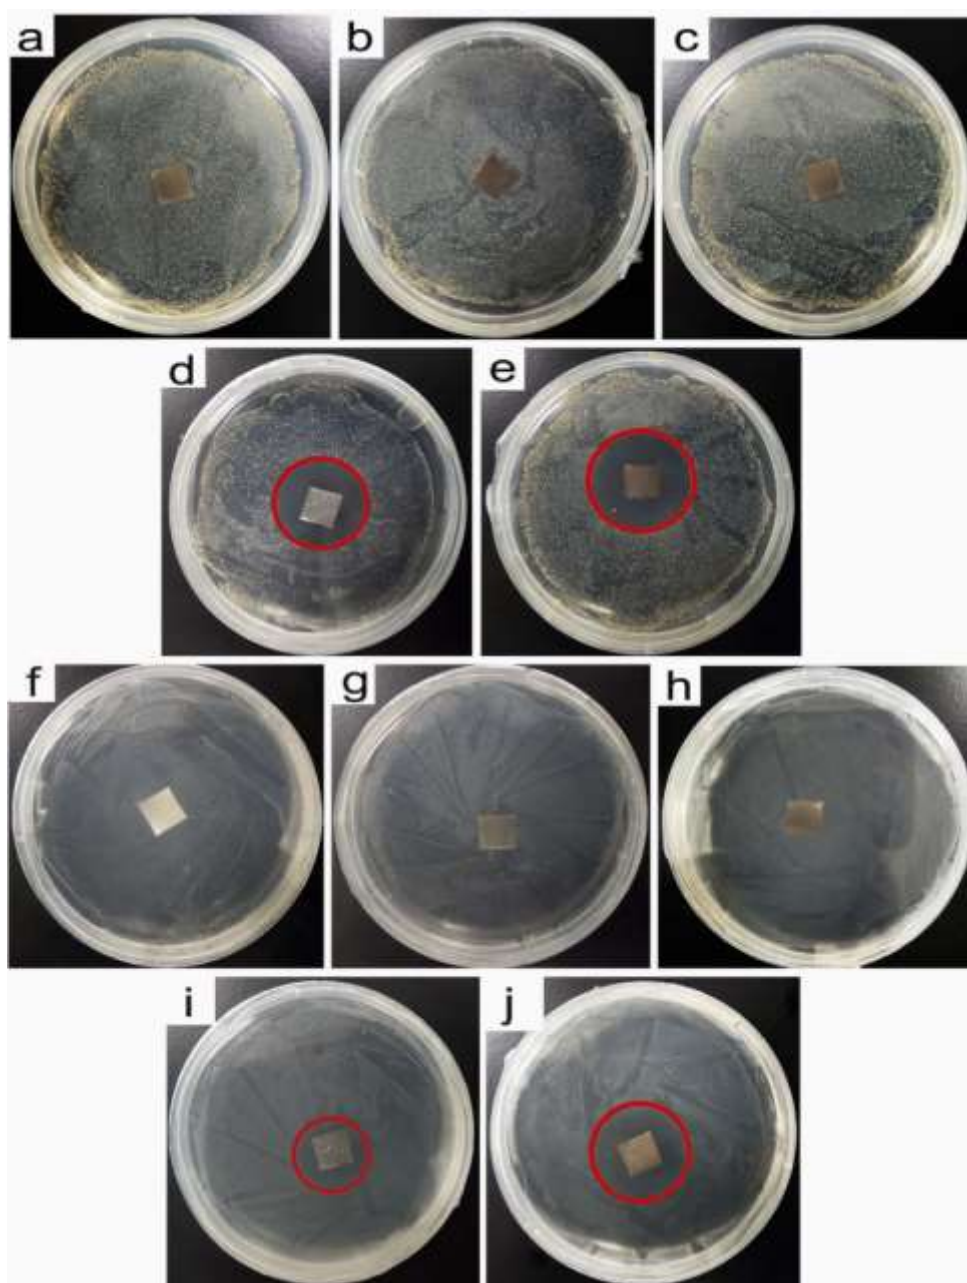

**Figure S2.** Images of Kirby-Bauer plates. Antibacterial properties against : *Staphylococcus aureus* of : (a) Ti, (b) Ti-PDA, (c) Ti-PDA/NF, (d) Ti/LBL, (e) Ti-PDA/NF/LBL; and *Escherichia coli* of: (f) Ti, (g) Ti-PDA, (h) Ti/LBL, (i) Ti-PDA/NF; (j) Ti-PDA/NF/LBL.

### Protein adsorption on substrates

Bovine serum albumin (BSA) was used to evaluate protein adsorption of different substrates in this study. First, all of samples were immersed into BSA solution (1 mg/mL in PBS) at 37°C for 4 h. After washing with PBS, SDS was used to extract the protein absorbed by the substrates. The amount of extracted protein was quantified with BCA assay kit using spectrophotometric plate reader at 370 nm.

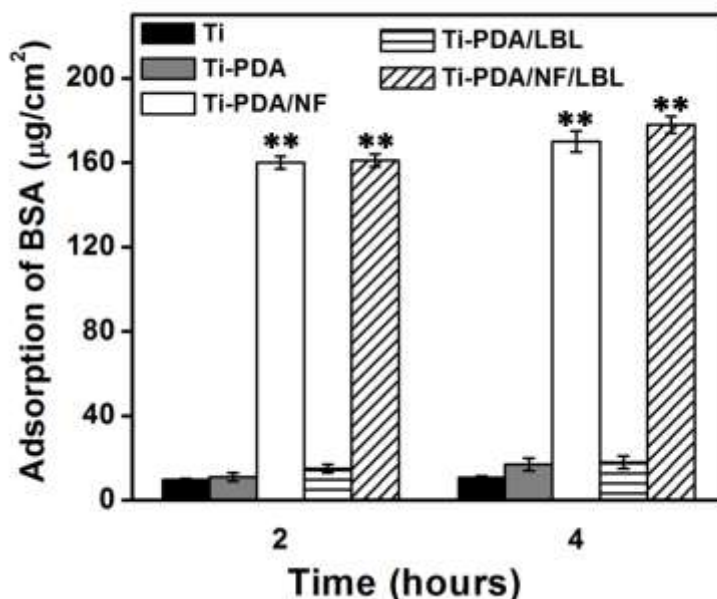

**Fig. S3.** Protein adsorption assay of different substrates. Ti was used as control for the statistical analysis. Error bars represent mean  $\pm$  SEM for n=4, \*\*p<0.01

Protein adsorption is an important factor closely related to the cytocompatibility of implant material, since the surface adsorbed proteins would further affect a series of cellular behaviors (e.g., cell adhesion, spreading, proliferation, differentiation, etc.). As shown in Fig S3, Ti-PDA/LBL showed higher protein adsorption compared to native Ti substrates. BSA could precipitate with TA. Therefore, the introduction of TA would result in higher protein adsorption. The result also showed that Ti-PDA/NF and Ti-PDA/NF/LBL showed highest protein adsorption among all groups. This may be attributed to the higher level of chitosan in these two substrates. At physiological pH, the protonated amino groups in chitosan would interact with the negatively charged BSA, leading to the enhanced adsorption of albumin and improving its affinity with BSA at the surface. Notably, the amount of absorbed protein was highest for Ti-PDA/NF/LBL, which was the combined result of BSA-chitosan / BSA-TA interaction and larger surface area. The observation was also consistent with several previous studies.<sup>1, 2</sup>

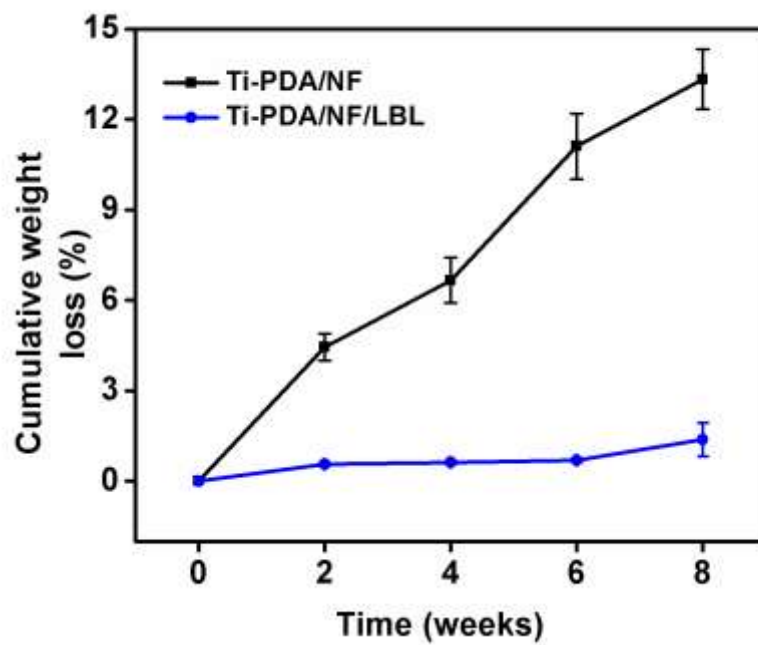

Fig. S4 *In vitro* degradation profile of Ti-PDA/NF.and Ti-PDA/NF/LBL

#### Additional References

1. Y. Gao, Y. B. Wang, Y. M. Wang and W. G. Cui, *Mar. Drugs*, 2016, **14**.
2. C. Wu, W. Y. Chang, H. Z. Qi, L. X. Long, J. Zhao, X. B. Yuan, Z. Y. Li and X. J. Yang, *J. Coat. Technol. Res.*, 2017, **14**, 1127-1135.
